# Supplementary material for: Cordylobia anthropophaga Myiasis Mimicking Hyperproliferative Skin Disorder in Traveler Returning from Sub-Saharan Africa
Source: MDPI journal article supplement (doi:10.3390/tropicalmed8110505), 2023-11-20
Supplement: s1 [file s1]

Supplementary Table S1 – Laboratory findings in the patient with *C. anthropophaga* myiasis

| Parameter of interest                      | Result | Status | Ref.values  |
|--------------------------------------------|--------|--------|-------------|
| Leukocyte count (10 <sup>9</sup> /L)       | 5.8    | WNL    | 4.0-9.0     |
| Lymphocytes (%)                            | 41.02  | WNL    | 20.00-50.00 |
| Neutrophiles (%)                           | 44.32  | WNL    | 40.00-70.00 |
| Monocytes (%)                              | 9.03   | WNL    | 1.00-10.00  |
| Eosinophiles (%)                           | 4.53   | WNL    | 0.00-6.00   |
| Red Blood Cell Count (10 <sup>12</sup> /L) | 4.96   | WNL    | 4.30-5.80   |
| Hemoglobin (g/L)                           | 148    | WNL    | 120-180     |
| Hematocrit (L/L)                           | 0.451  | WNL    | 0.410-0.560 |
| Platelet Count (10 <sup>9</sup> /L)        | 179    | WNL    | 120-380     |
| Glucose (mmol/L)                           | 5.1    | WNL    | 3.9-6.1     |
| Urea (μmol/L)                              | 6.2    | WNL    | 2.5-7.5     |
| Kreatinine (μmol/L)                        | 93.8   | WNL    | 53.0-115.0  |
| Total bilirubin (μmol/L)                   | 11.4   | WNL    | 5.0-21.0    |
| Direct bilirubin (μmol/L)                  | 2.7    | WNL    | 0.0-3.4     |
| Total proteins (g/L)                       | 75     | WNL    | 62-81       |
| Albumin (g/L)                              | 45     | WNL    | 35-52       |
| C-reactive proteine (mmol/L)               | 1.8    | WNL    | 0.0-5.0     |
| Cholesterol (mmol/L)                       | 4.15   | WNL    | 3.90-5.20   |
| Triglycerides (mmol/L)                     | 0.80   | WNL    | 0.70-1.70   |
| Sodium (mmol/L)                            | 138    | WNL    | 135-148     |

|                                                 |      |     |            |
|-------------------------------------------------|------|-----|------------|
| Potassium (mmol/L)                              | 4.2  | WNL | 3.5-5.5    |
| Chlorides (mmol/L)                              | 104  | WNL | 98-108     |
| Iron (μmol/L)                                   | 21.4 | WNL | 12.5-32.2  |
| Aspartate aminotransferase (U/L)                | 16   | WNL | 10-37      |
| Alanine aminotransferase (U/L)                  | 17   | WNL | 10-42      |
| Alkaline phosphatase (U/L)                      | 48   | WNL | 30-120     |
| Gamma glutamyl transpeptidase (U/L)             | 22   | WNL | 0-55       |
| Alpha amylase (U/L)                             | 46   | WNL | 28-100     |
| Creatine kinase (U/L)                           | 200  | ↑   | 0-195      |
| Creatine kinase-MB (U/L)                        | 6    | WNL | 0-24       |
| Rheumatism factor (IU/mL)                       | 7.10 | WNL | 0.00-14.00 |
| Prothrombin time International normalized ratio | 1.03 | WNL | 0.80-1.20  |
| Prothrombin time (%)                            | 95   | WNL | 75-120     |
| D-dimer (ng/mL)                                 | 135  | WNL | 0.0-250    |
